# Supplementary material for: Gastric Microbiota Gender Differences in Subjects with Healthy Stomachs and Autoimmune Atrophic Gastritis
Source: MDPI journal article supplement (doi:10.3390/microorganisms11081938), 2023-07-29

## Male controls

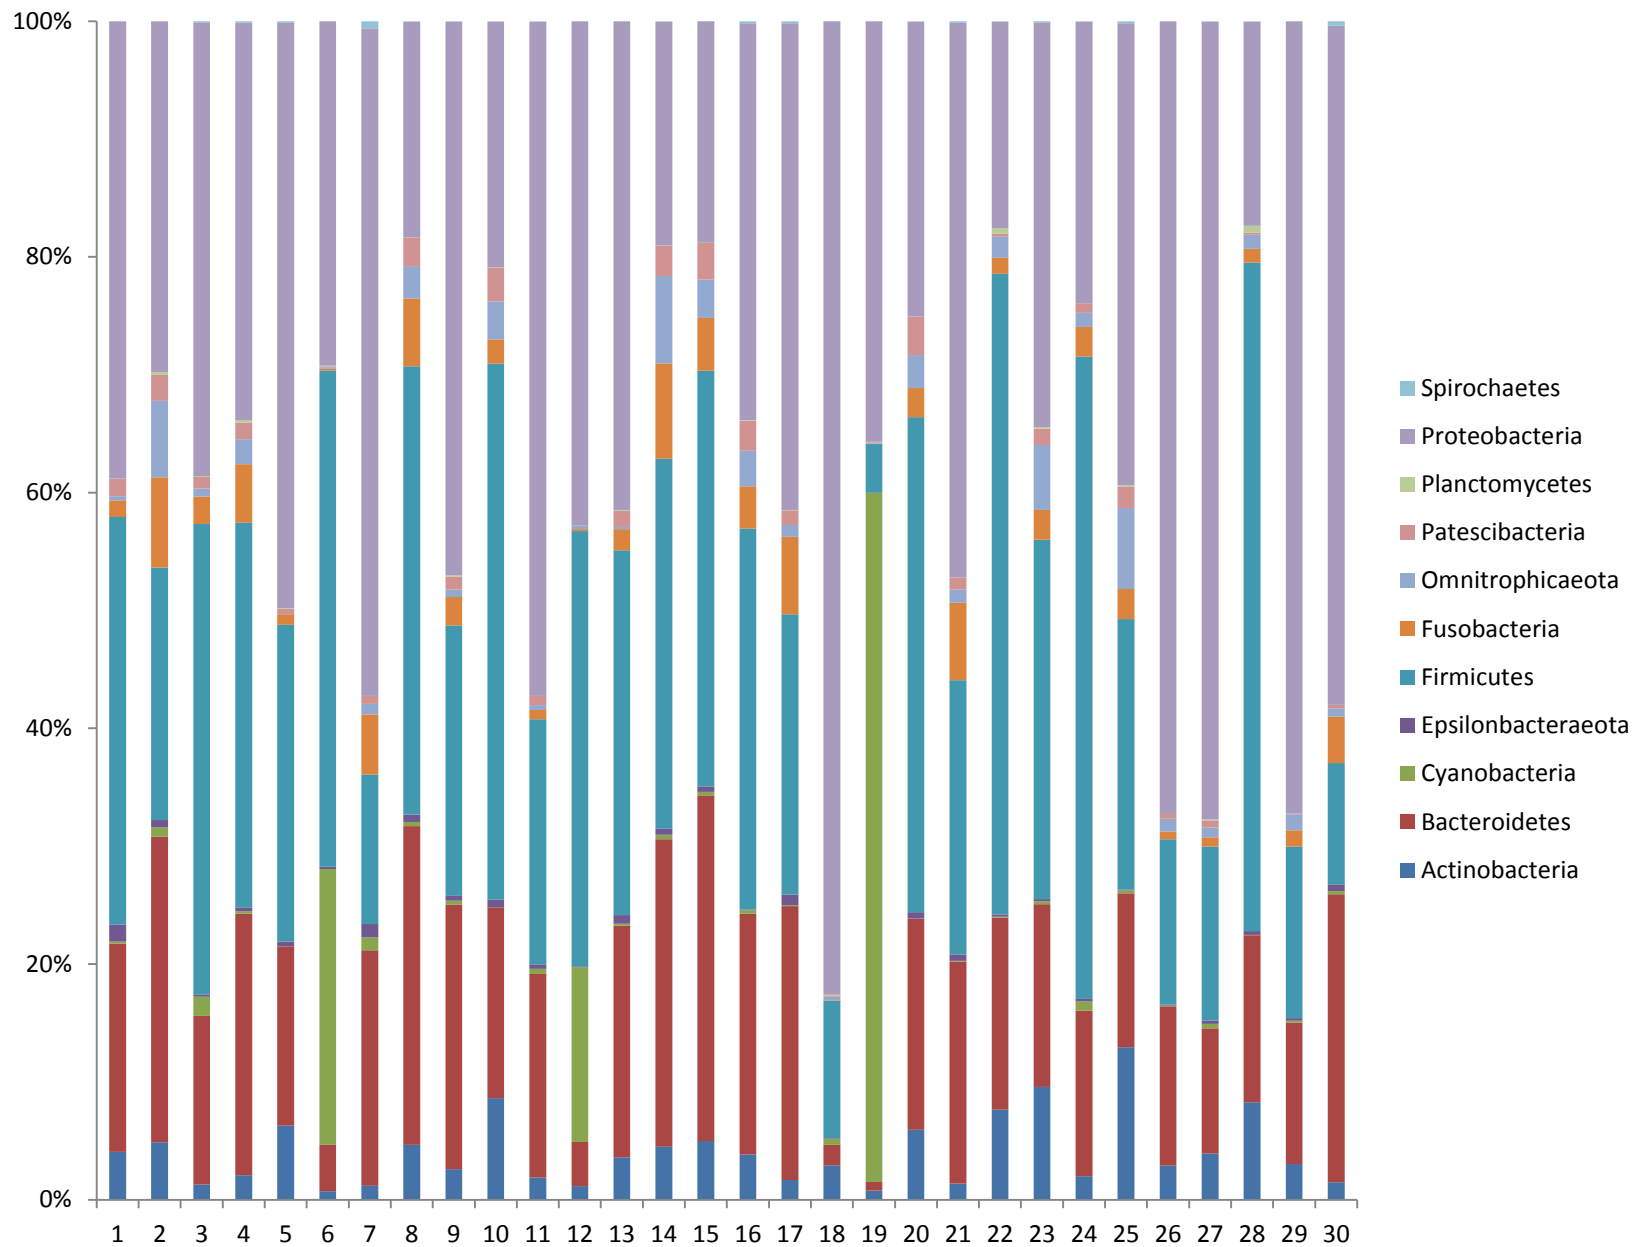

## Female controls

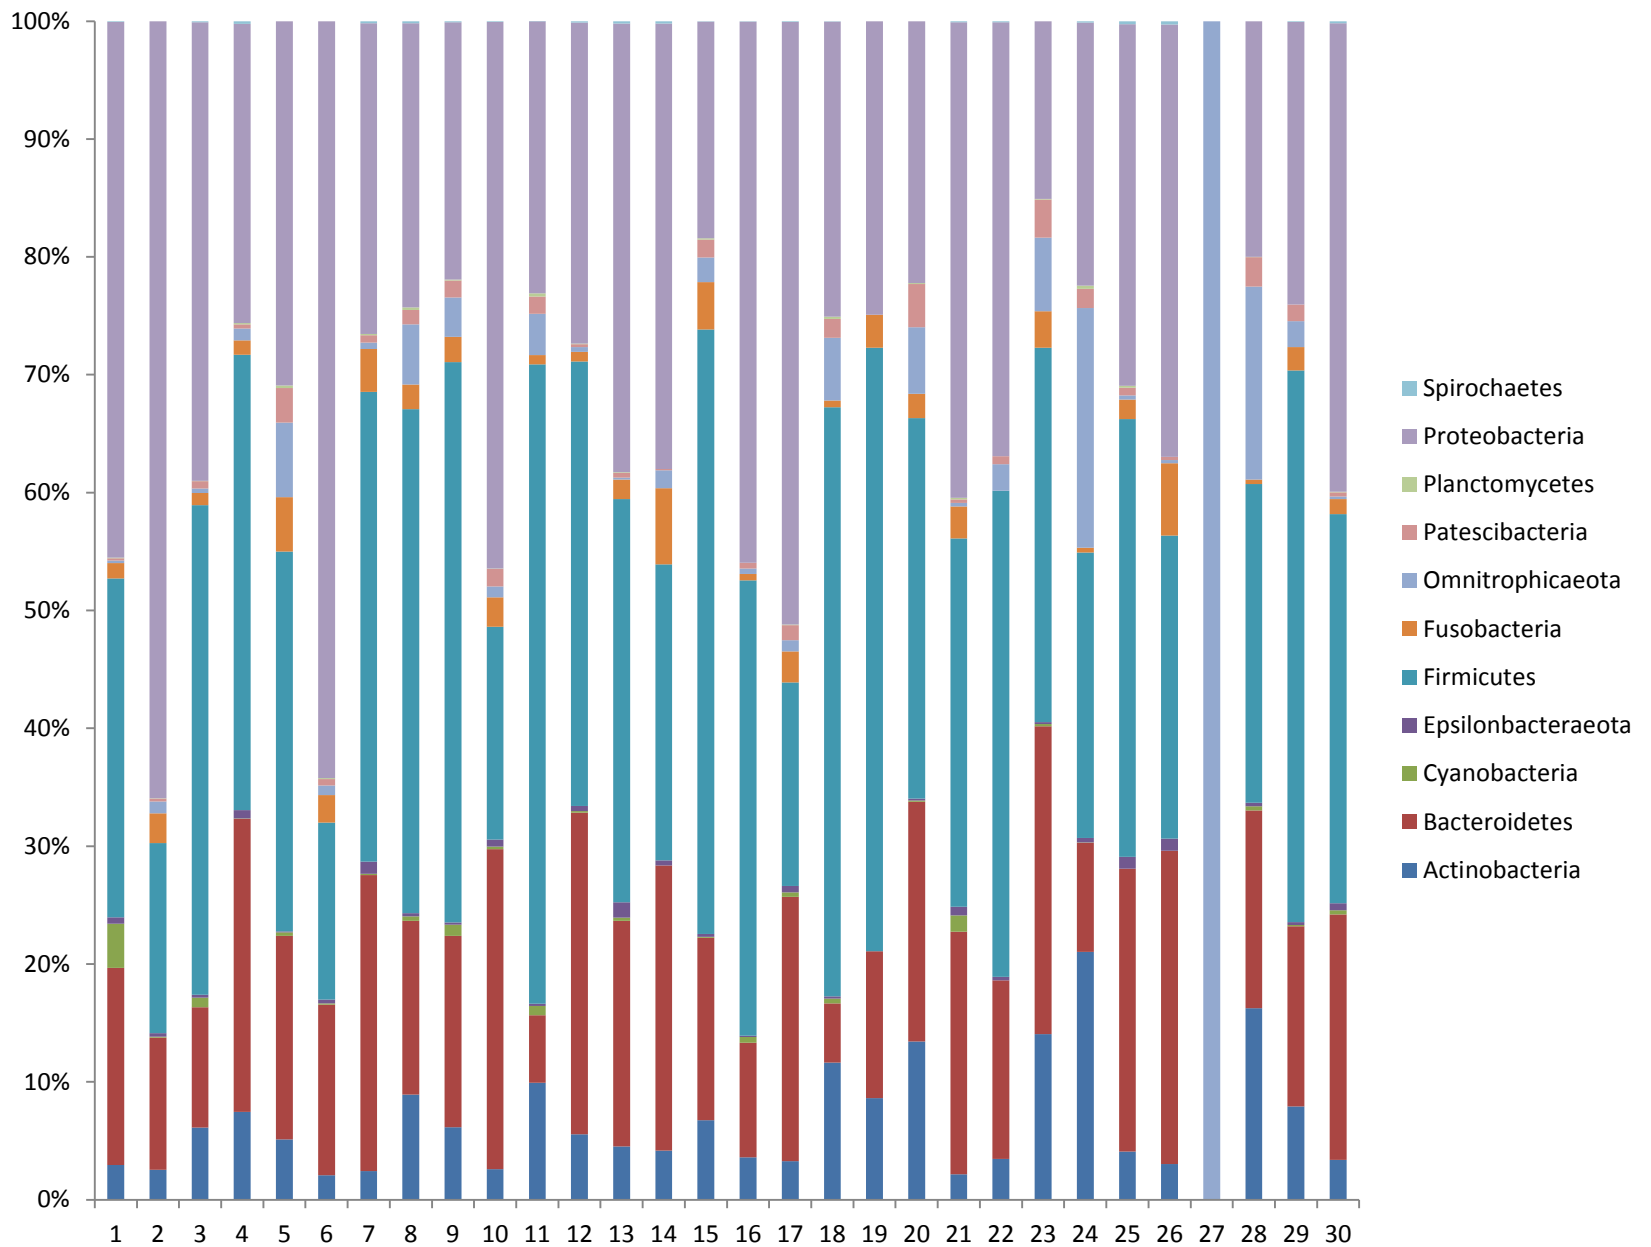

## Male cases with autoimmune atrophic gastritis

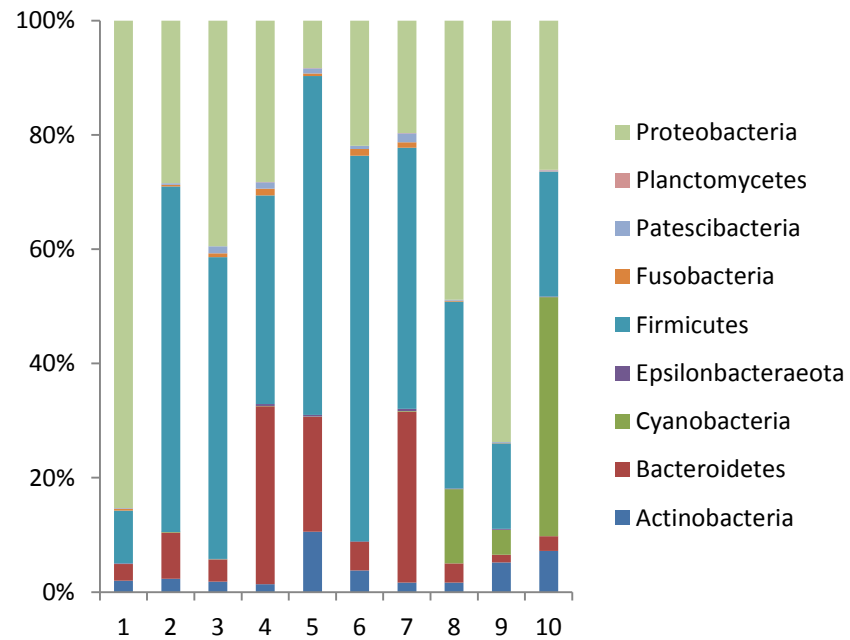

## Female cases with autoimmune atrophic gastritis

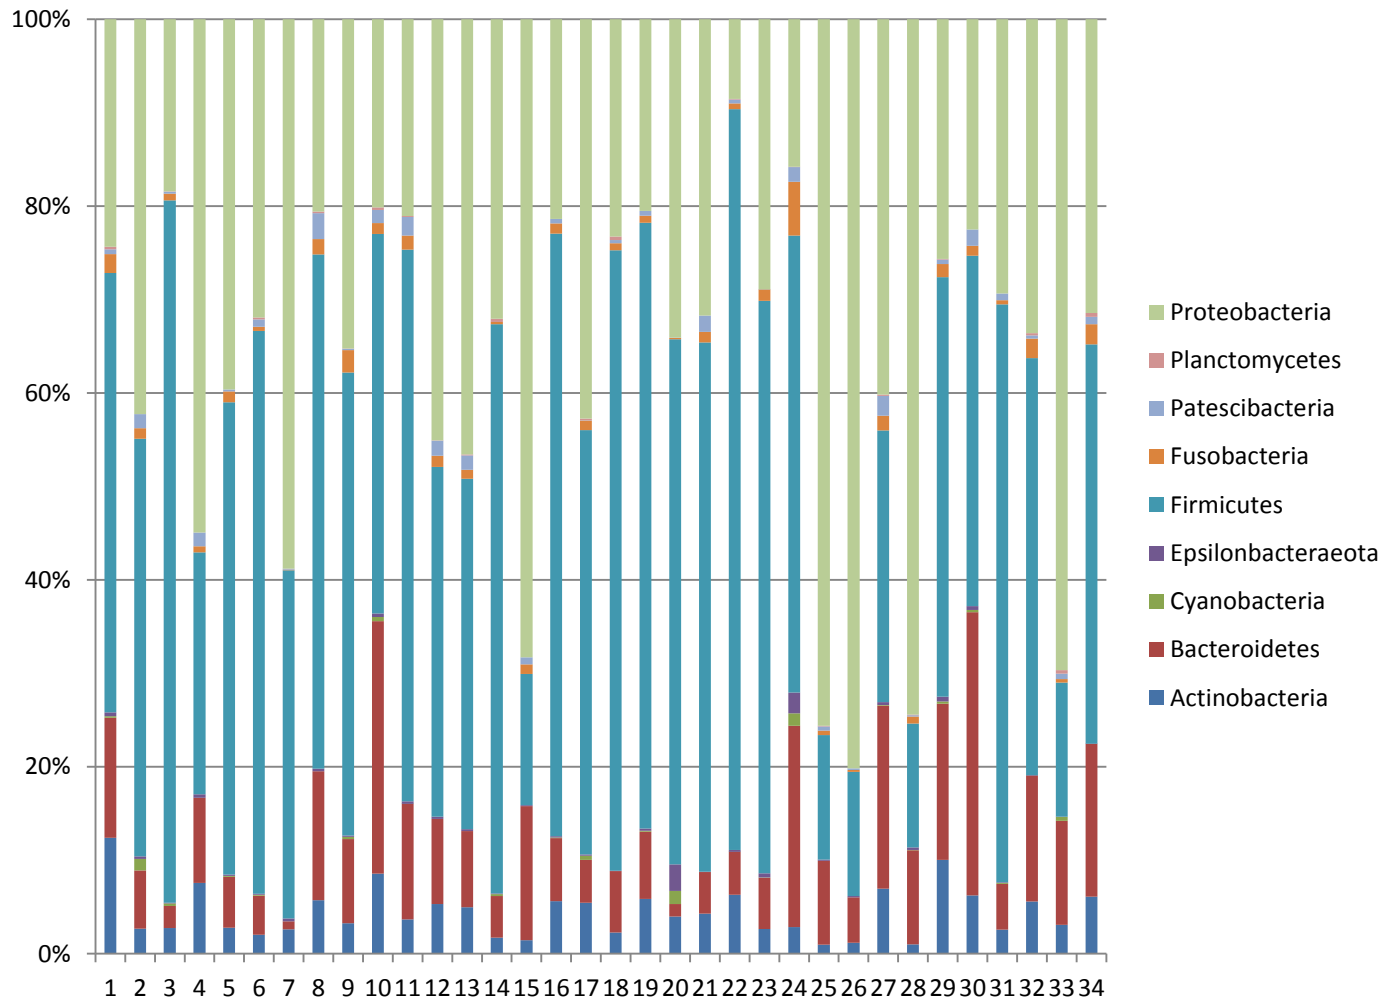

Supplement: s1 [file s1]
